# Supplementary material for: Hydroponic and Aquaponic Floating Raft Systems Elicit Differential Growth and Quality Responses to Consecutive Cuts of Basil Crop
Source: MDPI journal article supplement (doi:10.3390/plants12061355), 2023-03-17
Supplement: s1 [file s1]

**Table S1.** Nutrient concentration in the hydroponic (H) and aquaponic (AQ) systems

| System | Concentration (mg L <sup>-1</sup> ) |                 |       |                 |       |       |       |       |
|--------|-------------------------------------|-----------------|-------|-----------------|-------|-------|-------|-------|
|        | NO <sub>3</sub>                     | PO <sub>4</sub> | K     | SO <sub>4</sub> | Ca    | Mg    | Na    | Cl    |
| H      | 326.05                              | 25.69           | 94.79 | 76.40           | 57.07 | 11.32 | 9.24  | 5.95  |
| AQ     | 340.14                              | 11.23           | 40.23 | 44.14           | 74.60 | 15.01 | 31.42 | 52.17 |
